# Supplementary material for: Physics-informed Gaussian process regression of in operando capacitance for carbon supercapacitors
Source: Royal Society of Chemistry journal article supplement (doi:10.1039/d3ya00071k), 2023-01-01
Supplement: d3ya00071k1.pdf [file d3ya00071k1.pdf]

## Support Information

### Physics-informed Gaussian process regression of *in-operando* capacitance for carbon supercapacitors

Runtong Pan<sup>1</sup>, Mengyang Gu<sup>2</sup> and Jianzhong Wu<sup>1</sup>

<sup>1</sup>Department of Chemical and Environmental Engineering, University of California, Riverside, CA 92521, USA

<sup>2</sup>Department of Statistics and Applied Probability, University of California, Santa Barbara, CA 93106, USA

In this support information, we provide the formulas for calculating capacitance, the input data used for training the machine learning models and the methodology of Gaussian Process Regression (GPR). All the data are calculated from the CV curves collected from the literature. [1-7]

#### *Capacitive behavior*

The specific integral capacitance is given from the CV curves by

$$C_{sp} = \frac{\int_{V_{start}}^{V_{end}} i(V)dV}{2vm\Delta V} = \frac{\bar{I}\Delta V}{m\Delta V} = \frac{\bar{I}\Delta t}{m\Delta V} \quad (S1)$$

where  $v$  is the scan rate (V/s),  $i$  is the electrical current,  $m$  is the electrode mass,  $\Delta V$  is the potential window,  $\bar{I}$  is the average current,  $\Delta t = \Delta V/v$  is charging/discharging time, and  $C_{sp}$  stands for specific integral capacitance of the electrode.

The energy density is defined as

$$E = \frac{C_{cell}\Delta V^2}{2} = \frac{C_{sp}\Delta V^2}{8} = \frac{\bar{I}\Delta t\Delta V}{8m} \quad (S2)$$

where  $C_{cell}$  is the specific capacitance of a two-electrode symmetrical supercapacitor. The

power density is calculated from

$$P = \frac{E}{\Delta t} = \frac{\bar{I}\Delta V}{8m} . \quad (S3)$$

### ***Gaussian Process Regression (GPR) models***

GPR is a non-parametric Bayesian method for solving regression problems.[8, 9] The supervised ML can capture different kinds of relationships by using an appropriate kernel to capture the unknown relations between the independent and dependent variables.[10] By introducing a theoretically infinite number of parameters, kernels are widely used in supervised ML methods including not only GPR but also support vector machine (SVM), principal components analysis (PCA), canonical correlation, and ridge regression. The kernel functions empower the ML methods to operate in a high-dimensional, implicit feature space by computing the inner products between the images of all pairs of data in the feature space.

In this work, the predictors used in regression are all standardized, so they are unitless values in regression.  $X = [z_1, z_2, \dots, z_n]$

$$z_i = \frac{x_i - \mu_i}{\sigma_i} \quad (S4)$$

where  $\mu_i, \sigma_i$  are the mean and standard deviation of original input predictor  $x_i$ , so they are unitless values in the model.

Specifically, GPR provides the mapping from a predictor matrix  $X = [x_1, x_2, \dots, x_n]$  to a response vector  $y$ . [9, 11, 12]. Consider one input observation  $x = [z_1, z_2, \dots, z_n]$  (in this work,  $x = [z_v, z_{S_{micro}}, z_{S_{meso}}]$ , the standardized input observation of  $[v, S_{micro}, S_{meso}]$ ), and its corresponding response value  $y$ , the mapping is assumed to be an unknown function,  $y = f(x) + \varepsilon$ , where  $\varepsilon \sim N(0, \sigma^2)$  is an independent zero-mean Gaussian noise with a standard deviation of  $\sigma$ . GPR defines a probability distribution with function

$$f(x) \sim MN(m(x), \kappa(x, x')) \quad (S5)$$

where  $m(x)$  and  $\kappa(x, x')$  are the mean and covariance functions:

$$\{m(x) = E[f(x)] \quad \kappa(x, x') = E[(f(x) - m(x))(f(x') - m(x'))]\} \quad (S6)$$

Usually, the mean function is assumed to be a basis function in the form as:

$$m(x) = H(x)\beta \quad (S7)$$

where  $H(x)$  is the basis matrix,  $\beta$  is a vector of basis coefficients.

Common selections of the basis matrix include the constant basis ( $H = 1$ ), the linear basis ( $H = [1, X]$ ), and the ‘pure Quadratic’ basis:

$$H = [1, X, X_2] \quad (S8)$$

where  $X_2$  is half-vectorization of the quadratic form of the predictors.

The prediction mean  $\hat{y}$  and variance  $y^{sd}$  of the response value at a given point  $x^*$  are:

$$\hat{y}(x^*) = m(x^*) + K(x^*, X)^T [K(X, X) + \sigma^2 I_n]^{-1} (y - u) \quad (S9)$$

$$y^{sd} = K(x^*, x^*) - K(x^*, X)^T [K(X, X) + \sigma^2 I_n]^{-1} K(X, x^*) \quad (S10)$$

where

$$K(x^*, X) = [\kappa(x^*, x_1), \kappa(x^*, x_2), \dots, \kappa(x^*, x_n)] \quad (S11)$$

The covariance function (or kernel function) is the major component of a GP model. Under the stationary condition,  $\kappa(x, x') = \sigma^2 f_\kappa(x - x')$ , where  $\sigma^2$  being a variance parameter, which is the signal standard deviation and  $f_\kappa$  is a correlation function, with  $f_\kappa(0) = 1$ . The covariance

function is assumed to be isotropic, i.e.,  $\kappa(x, x') = \sigma^2 f_\kappa(d)$ , where  $d = \|x - x'\| = \sqrt{\sum_{i=1}^n (x_i - x'_i)^2}$

being the Euclidean distance between  $x$  and  $x'$ . The frequently used covariance functions include power exponential correlation, Matérn correlation and Rational Quadratic correlation.[9] We can see that the correlation function can be normalized by a length scale  $\gamma$ .

so

$$\kappa(x, x') = \sigma^2 f_\kappa(x - x') = \sigma^2 f_\kappa(d) = \sigma^2 f_{\kappa 0}(r) \quad (S12)$$

where  $r = \frac{d}{\gamma} = \frac{|x - x'|}{\gamma}$  being the related radius.

It's also possible to use a separate length scale  $\gamma_m$  for each predictor  $m$ , called automatic relevance determination (ARD). This can be done by replacing all the related distance  $\frac{d}{\gamma}$  by related radius  $r$  with separate length scale for each predictor:

$$r = \sqrt{\sum_{m=1}^D \frac{(x_{im} - x_{jm})^2}{\gamma_m^2}} \quad (\text{S13})$$

The power exponential correlation kernel is given by:

$$\kappa(x, x') = \sigma^2 \exp\{- (r)^\alpha\} \quad (\text{S14})$$

Where  $\sigma$  is the signal standard deviation,  $\alpha \in (0, 2]$  is the roughness parameter of the kernel function. When  $\alpha = 2$ , the kernel function is called Squared Exponential Kernel or Gaussian kernel, which is infinitely differentiable.

The Matérn correlation kernel is

$$\kappa(x, x') = \sigma^2 \frac{1}{2^{\alpha-1} \Gamma(\alpha)} (r)^\alpha K_\alpha(r) \quad (\text{S15})$$

where  $K_\alpha$  are the modified Bessel function of the second kind and the roughness parameter.

This kernel is  $\lceil \alpha \rceil - 1$  differentiable, where  $\lceil \alpha \rceil$  means the ceiling integer of  $\alpha$ .  $\alpha = \frac{3}{2}$  or  $\frac{5}{2}$  are most

frequently used Matérn kernels. When  $\alpha = \frac{1}{2}$ , it becomes the exponential kernel function. When  $\alpha \rightarrow \infty$ , it converges to the Gaussian kernel.

The Rational Quadratic correlation kernel has the following form

$$\kappa(x, x') = \sigma^2 \left(1 + \frac{r^2}{2\alpha}\right)^{-\alpha} \quad (\text{S16})$$

where  $\alpha$  is a positive-valued scale-mixture parameter. This kernel is infinitely differentiable as the Gaussian kernel. It can be interpreted as an infinite sum of different Gaussian kernels with different characteristic length scales. Here,  $\alpha$  means the weighting between different length

scales. When  $\alpha \rightarrow \infty$ , it converges to the Gaussian kernel.

In this work, we have tested all these covariance functions except exponential correlation, which is not smooth, and using the ARD kernels since it's clear that the scan rate needs a different scaling length comparing to the surface area.

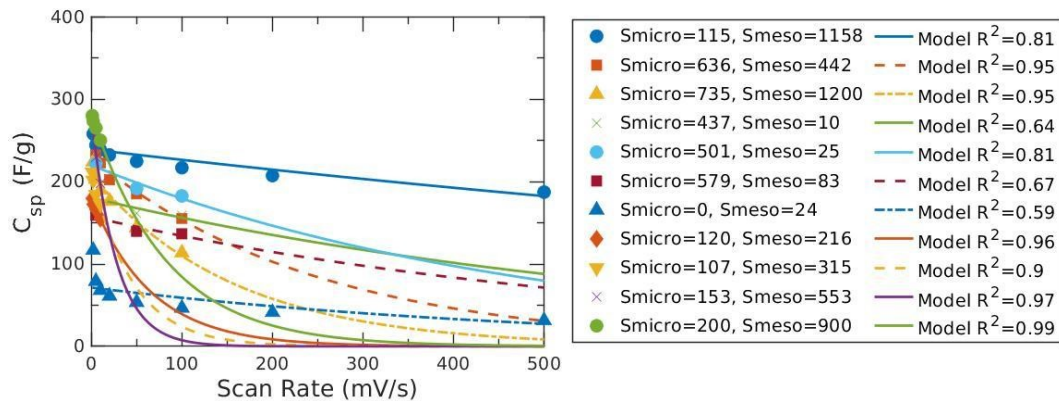

Fig S1 Correlation of the specific capacitance-scan rate relationship based on a semi-empirical physical model (Eqn (1)) for the carbon materials with enough data points.

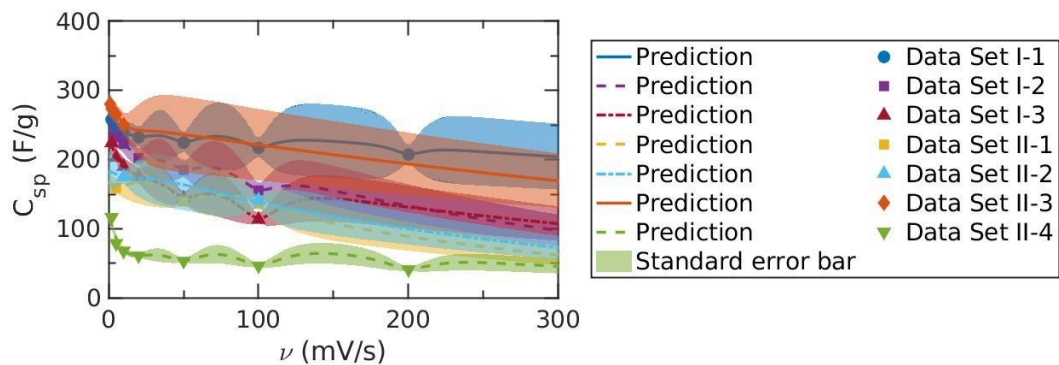

Fig S2 The specific capacitance versus the scan rate predicted by PhysGPR with non-ARD Matérn 3/2 kernel, shows strong overfitting. The specific surface areas of electrode materials are: Data Set I-1:  $S_{micro} = 115 \text{ m}^2/\text{g}$ ,  $S_{meso} = 1158 \text{ m}^2/\text{g}$ ; Data Set I-2:  $S_{micro} = 636 \text{ m}^2/\text{g}$ ,  $S_{meso} = 442 \text{ m}^2/\text{g}$ ; and Data Set I-3:  $S_{micro} = 735 \text{ m}^2/\text{g}$ ,  $S_{meso} = 1200 \text{ m}^2/\text{g}$ . Data Set II-1:  $S_{micro} = 579 \text{ m}^2/\text{g}$ ,  $S_{meso} = 83 \text{ m}^2/\text{g}$ , Data Set II-2:  $S_{micro} = 481 \text{ m}^2/\text{g}$ ,  $S_{meso} = 193 \text{ m}^2/\text{g}$ , Data Set II-3:  $S_{micro} = 200 \text{ m}^2/\text{g}$ ,  $S_{meso} = 900 \text{ m}^2/\text{g}$ , Data Set II-4:  $S_{micro} = 0 \text{ m}^2/\text{g}$ ,  $S_{meso} = 24 \text{ m}^2/\text{g}$ .

**Table S1** Dataset for the capacitive performance of carbon electrodes. Columns:  $C_{sp}$ : specific capacitance. E: Energy density. P: Power density.  $S_{A_{micro}}$ : Specific micropore surface area

( $d < 2\text{nm}$ )  $SA_{\text{meso}}$ : specific mesopore surface area ( $2\text{nm} < d < 50\text{nm}$ )  $\nu$ : cyclic voltammetry scan

rate

| #  | $C_{\text{sp}}/(\text{F/g})$ | $E/(\text{Wh/kg})$ | $P/(\text{kW/kg})$ | $SA_{\text{micro}}/(\text{m}^2/\text{g})$ | $SA_{\text{meso}}/(\text{m}^2/\text{g})$ | $\nu/(\text{mV/s})$ |
|----|------------------------------|--------------------|--------------------|-------------------------------------------|------------------------------------------|---------------------|
| 1  | 0                            | 0                  | 0                  | 0                                         | 0                                        | 0                   |
| 2  | 0                            | 0                  | 0                  | 0                                         | 0                                        | 5                   |
| 3  | 0                            | 0                  | 0                  | 0                                         | 0                                        | 10                  |
| 4  | 188.58                       | 6.548              | 0.118              | 1990                                      | 879                                      | 5                   |
| 5  | 232.27                       | 8.065              | 0.145              | 636                                       | 442                                      | 5                   |
| 6  | 222.77                       | 7.735              | 0.278              | 636                                       | 442                                      | 10                  |
| 7  | 202.29                       | 7.024              | 0.506              | 636                                       | 442                                      | 20                  |
| 8  | 185.15                       | 6.429              | 1.157              | 636                                       | 442                                      | 50                  |
| 9  | 155.41                       | 5.396              | 1.943              | 636                                       | 442                                      | 100                 |
| 10 | 185.11                       | 6.428              | 0.116              | 713                                       | 290                                      | 5                   |
| 11 | 170.51                       | 5.921              | 0.213              | 457                                       | 126                                      | 10                  |
| 12 | 101.47                       | 3.523              | 1.268              | 457                                       | 126                                      | 100                 |
| 13 | 160.84                       | 5.585              | 0.201              | 429                                       | 188                                      | 10                  |
| 14 | 115.52                       | 4.011              | 1.444              | 429                                       | 188                                      | 100                 |
| 15 | 175.29                       | 6.086              | 0.219              | 481                                       | 193                                      | 10                  |
| 16 | 141.55                       | 4.915              | 1.769              | 481                                       | 193                                      | 100                 |
| 17 | 253.90                       | 8.816              | 0.317              | 1118                                      | 504                                      | 10                  |
| 18 | 203.05                       | 7.050              | 2.538              | 1118                                      | 504                                      | 100                 |
| 19 | 224.15                       | 7.783              | 0.056              | 735                                       | 1200                                     | 2                   |
| 20 | 202.99                       | 7.048              | 0.127              | 735                                       | 1200                                     | 5                   |
| 21 | 189.89                       | 6.593              | 0.237              | 735                                       | 1200                                     | 10                  |
| 22 | 176.24                       | 6.119              | 0.441              | 735                                       | 1200                                     | 20                  |
| 23 | 144.14                       | 5.005              | 0.901              | 735                                       | 1200                                     | 50                  |
| 24 | 113.60                       | 0.394              | 0.142              | 735                                       | 1200                                     | 100                 |

---

|    |        |       |       |      |      |     |
|----|--------|-------|-------|------|------|-----|
| 25 | 241.54 | 8.387 | 0.151 | 1506 | 269  | 5   |
| 26 | 212.44 | 7.376 | 0.266 | 1506 | 269  | 10  |
| 27 | 207.12 | 7.192 | 0.518 | 1506 | 269  | 20  |
| 28 | 197.94 | 6.873 | 1.237 | 1506 | 269  | 50  |
| 29 | 198.00 | 6.875 | 2.475 | 1506 | 269  | 100 |
| 30 | 182.58 | 6.340 | 0.114 | 437  | 10   | 5   |
| 31 | 161.70 | 5.615 | 1.011 | 437  | 10   | 50  |
| 32 | 158.97 | 5.520 | 1.987 | 437  | 10   | 100 |
| 33 | 221.86 | 7.703 | 0.139 | 501  | 25   | 5   |
| 34 | 191.76 | 6.658 | 1.198 | 501  | 25   | 50  |
| 35 | 182.59 | 6.340 | 2.282 | 501  | 25   | 100 |
| 36 | 159.09 | 5.524 | 0.099 | 579  | 83   | 5   |
| 37 | 139.68 | 4.850 | 0.873 | 579  | 83   | 50  |
| 38 | 136.66 | 4.745 | 1.708 | 579  | 83   | 100 |
| 39 | 116.85 | 4.057 | 0.029 | 0    | 24   | 2   |
| 40 | 79.11  | 2.747 | 0.049 | 0    | 24   | 5   |
| 41 | 68.03  | 2.362 | 0.085 | 0    | 24   | 10  |
| 42 | 61.20  | 2.125 | 0.153 | 0    | 24   | 20  |
| 43 | 53.48  | 1.857 | 0.334 | 0    | 24   | 50  |
| 44 | 46.58  | 1.617 | 0.582 | 0    | 24   | 100 |
| 45 | 41.30  | 1.434 | 1.033 | 0    | 24   | 200 |
| 46 | 31.42  | 1.091 | 1.964 | 0    | 24   | 500 |
| 47 | 257.94 | 8.956 | 0.064 | 115  | 1158 | 2   |
| 48 | 244.31 | 8.483 | 0.153 | 115  | 1158 | 5   |
| 49 | 238.34 | 8.276 | 0.298 | 115  | 1158 | 10  |
| 50 | 232.37 | 8.068 | 0.581 | 115  | 1158 | 20  |
| 51 | 224.65 | 7.800 | 1.404 | 115  | 1158 | 50  |

---

|    |        |       |        |     |      |     |
|----|--------|-------|--------|-----|------|-----|
| 52 | 216.90 | 7.531 | 2.711  | 115 | 1158 | 100 |
| 53 | 207.36 | 7.200 | 5.184  | 115 | 1158 | 200 |
| 54 | 187.26 | 6.502 | 11.704 | 115 | 1158 | 500 |
| 55 | 179.60 | 6.236 | 0.022  | 120 | 216  | 1   |
| 56 | 172.40 | 5.986 | 0.043  | 120 | 216  | 2   |
| 57 | 166.30 | 5.774 | 0.104  | 120 | 216  | 5   |
| 58 | 155.00 | 5.382 | 0.194  | 120 | 216  | 10  |
| 59 | 211.60 | 7.347 | 0.026  | 107 | 315  | 1   |
| 60 | 201.60 | 7.000 | 0.050  | 107 | 315  | 2   |
| 61 | 184.20 | 6.396 | 0.115  | 107 | 315  | 5   |
| 62 | 172.60 | 5.993 | 0.216  | 107 | 315  | 10  |
| 63 | 277.00 | 9.618 | 0.035  | 153 | 553  | 1   |
| 64 | 259.60 | 9.014 | 0.065  | 153 | 553  | 2   |
| 65 | 229.50 | 7.969 | 0.143  | 153 | 553  | 5   |
| 66 | 198.10 | 6.878 | 0.248  | 153 | 553  | 10  |
| 67 | 280.10 | 9.726 | 0.035  | 200 | 900  | 1   |
| 68 | 273.5  | 9.497 | 0.068  | 200 | 900  | 2   |
| 69 | 265.2  | 9.208 | 0.166  | 200 | 900  | 5   |
| 70 | 250.1  | 8.684 | 0.313  | 200 | 900  | 10  |

Note: 1-3: Artificial zero surface area points. 4-10[1]; 11-18[2]; 19-24[3]; 25-29[4]; 30-38[5]; 39-54[6]; 55-70[7];

## References

1. Li, Y.T., et al., Hierarchical porous active carbon from fallen leaves by synergy of K<sub>2</sub>CO<sub>3</sub> and their supercapacitor performance. *Journal of Power Sources*, 2015. **299**: p. 519-528.
2. Zhang, D.D., et al., Scalable synthesis of hierarchical macropore-rich activated carbon microspheres assembled by carbon nanoparticles for high rate performance supercapacitors. *Journal of Power Sources*, 2017. **342**: p. 363-370.
3. Zhang, J.T., et al., Preparation of activated carbon from waste *Camellia oleifera* shell for supercapacitor application. *Journal of Solid State Electrochemistry*, 2012. **16**(6): p. 2179-2186.



4. Jiang, L., et al., High rate performance activated carbons prepared from ginkgo shells for electrochemical supercapacitors. *Carbon*, 2013. **56**: p. 146-154.
5. Yang, W., et al., Template-free synthesis of ultrathin porous carbon shell with excellent conductivity for high-rate supercapacitors. *Carbon*, 2017. **111**: p. 419-427.
6. Jiang, L.L., et al., Construction of nitrogen-doped porous carbon buildings using interconnected ultra-small carbon nanosheets for ultra-high rate supercapacitors. *Journal of Materials Chemistry A*, 2016. **4**(29): p. 11388-11396.
7. Wu, H., et al., The effect of activation technology on the electrochemical performance of calcium carbide skeleton carbon. *Journal of Solid State Electrochemistry*, 2012. **16**(9): p. 2941-2947.
8. Kennedy, M.C. and A. O'Hagan, *Bayesian calibration of computer models*. *Journal of the Royal Statistical Society: Series B (Statistical Methodology)*, 2001. **63**(3): p. 425-464.
9. Rasmussen, C.E. and C.K.I. Williams, *Gaussian Processes for Machine Learning*. 2005, Cambridge, Massachusetts: The MIT Press.
10. Hofmann, T., B. Schölkopf, and A.J. Smola, *Kernel methods in machine learning*. *The Annals of Statistics*, 2008. **36**(3).
11. Pedregosa, F., et al., *Scikit-learn: Machine Learning in Python*. *Journal of Machine Learning Research*, 2011. **12**: p. 2825-2830.
12. Wu, J. and M. Gu, Emulating the first principles of matter: A probabilistic roadmap. arXiv preprint arXiv:2010.05942, 2020.
